# Supplementary material
Source: Elsevier journal article supplement (https://www.sciencedirect.com/science/article/pii/S0300893224000757)
Supplement: mmc1 [file mmc1.pdf]

**MATERIAL ADICIONAL**

**Tabla 1 del material adicional**

Prevalencias de exposición al humo ambiental de tabaco e intervalo de confianza del 95% en varones por grupo de edad y comunidad autónoma para los años 2017 y 2020. Las prevalencias se estimaron aplicando un modelo logístico multinomial mixto con efectos aleatorios de área.

| Comunidad autónoma     | Año 2017         |                  |                 |                | Año 2020         |                  |                  |                 |
|------------------------|------------------|------------------|-----------------|----------------|------------------|------------------|------------------|-----------------|
|                        | 35-54 años       | 55-64 años       | 65-74 años      | ≥ 75 años      | 35-54 años       | 55-64 años       | 65-74 años       | ≥ 75 años       |
| Andalucía              | 25,5 (20,4-30,5) | 30,7 (23,1-38,2) | 9,2 (6,0-12,5)  | 7,4 (4,0-10,8) | 30,8 (23,4-38,2) | 30,4 (21,6-39,3) | 12,8 (8,3-17,4)  | 11,4 (6,0-16,7) |
| Aragón                 | 20,1 (14,1-26,0) | 23,9 (14,3-33,6) | 8,5 (4,0-13,1)  | 6,0 (2,0-10,0) | 8,5 (5,1-11,9)   | 10,5 (5,3-15,7)  | 9,0 (3,0-15,1)   | 2,8 (0,5-5,1)   |
| Principado de Asturias | 10,2 (6,4-13,9)  | 6,5 (3,4-9,6)    | 4,4 (1,8-7,0)   | 2,4 (0,8-3,9)  | 6,4 (4,0-8,9)    | 5,6 (2,8-8,5)    | 5,0 (2,0-8,1)    | 2,1 (0,5-3,8)   |
| Islas Baleares         | 13,4 (8,1-18,7)  | 10,4 (5,1-15,7)  | 3,1 (1,1-5,0)   | 2,2 (0,6-3,8)  | 14,4 (8,3-20,6)  | 15,1 (7,2-23,1)  | 14,4 (5,1-23,8)  | 6,1 (1,0-11,3)  |
| Canarias               | 6,5 (4,0-8,9)    | 9,5 (5,2-13,7)   | 3,1 (1,3-4,9)   | 2,2 (0,7-3,7)  | 25,9 (17,3-34,6) | 24,5 (13,6-35,4) | 13,4 (6,6-20,2)  | 6,5 (2,2-10,8)  |
| Cantabria              | 7,4 (4,3-10,5)   | 13,2 (7,8-18,6)  | 5,0 (2,3-7,7)   | 2,4 (0,9-3,9)  | 19,9 (12,5-27,2) | 18,2 (9,7-26,7)  | 3,4 (1,5-5,2)    | 5,0 (1,6-8,5)   |
| Castilla y León        | 18,4 (13,0-23,9) | 18,0 (11,4-24,5) | 5,6 (3,0-8,2)   | 4,5 (1,9-7,1)  | 11,4 (7,2-15,7)  | 5,1 (2,5-7,6)    | 9,4 (4,4-14,4)   | 4,4 (1,4-7,5)   |
| Castilla-La Mancha     | 16,3 (11,4-21,2) | 9,0 (5,5-12,6)   | 10,1 (4,7-15,5) | 3,6 (1,4-5,8)  | 26,1 (18,4-33,8) | 25,1 (16,8-33,4) | 17,5 (10,5-34,4) | 5,2 (2,3-8,1)   |
| Cataluña               | 10,3 (8,1-12,4)  | 7,9 (4,6-11,1)   | 4,7 (2,3-7,1)   | 3,1 (1,2-5,0)  | 7,0 (5,0-8,9)    | 7,0 (4,2-9,7)    | 7,9 (3,7-12,1)   | 2,4 (0,9-3,8)   |
| Comunidad Valenciana   | 13,1 (9,0-17,3)  | 10,9 (6,1-15,7)  | 8,2 (3,7-12,6)  | 2,4 (0,8-4,1)  | 23,3 (16,0-30,6) | 14,9 (9,6-20,1)  | 9,6 (4,8-14,3)   | 8,5 (3,6-13,4)  |
| Extremadura            | 14,3 (9,4-19,2)  | 10,5 (5,9-15,1)  | 4,1 (1,6-6,6)   | 1,2 (0,1-2,4)  | 17,8 (11,7-23,8) | 15,9 (7,0-24,8)  | 4,2 (1,2-7,2)    | 2,9 (0,0-5,8)   |
| Galicia                | 7,0 (4,5-9,5)    | 9,2 (5,7-12,7)   | 6,2 (3,1-9,2)   | 3,7 (1,6-5,8)  | 16,8 (11,4-22,3) | 6,7 (3,7-9,6)    | 6,8 (3,5-10,0)   | 2,8 (1,0-4,6)   |
| Comunidad de Madrid    | 10,7 (7,6-13,7)  | 11,5 (6,8-16,1)  | 5,4 (2,6-8,2)   | 2,2 (0,7-3,8)  | 7,9 (5,0-10,9)   | 5,5 (3,0-7,9)    | 4,2 (1,6-6,7)    | 2,6 (0,2-5,0)   |
| Región de Murcia       | 22,1 (16,1-28,1) | 11,8 (6,4-17,2)  | 11,4 (4,3-18,5) | 6,1 (1,9-10,2) | 8,4 (6,2-10,6)   | 10,0 (5,0-15,0)  | 3,6 (1,3-6,0)    | 2,6 (0,4-4,7)   |

|                            |                 |                 |                 |               |                 |                 |                |               |
|----------------------------|-----------------|-----------------|-----------------|---------------|-----------------|-----------------|----------------|---------------|
| Comunidad Foral de Navarra | 15,1 (9,7-20,6) | 13,6 (8,1-19,1) | 11,1 (5,2-17,0) | 3,9 (1,4-6,3) | 15,2 (9,0-21,4) | 7,4 (3,0-11,7)  | 8,2 (1,6-14,8) | 3,9 (0,5-7,2) |
| País Vasco                 | 8,0 (5,1-10,9)  | 5,4 (2,8-7,9)   | 3,0 (1,1-4,9)   | 1,7 (0,6-2,9) | 14,0 (8,5-19,4) | 17,0 (8,7-25,2) | 6,4 (2,5-10,2) | 3,9 (1,0-6,7) |
| La Rioja                   | 9,7 (5,1-14,3)  | 6,7 (3,1-10,2)  | 5,5 (1,7-9,2)   | 2,5 (0,7-4,2) | 11,1 (5,6-16,5) | 4,5 (1,7-7,3)   | 7,5 (0,9-14,1) | 2,0 (0,2-3,8) |

**Tabla 2 del material adicional**

Prevalencias de exposición al humo ambiental de tabaco e intervalo de confianza del 95% en mujeres por grupo de edad y comunidad autónoma para los años 2017 y 2020. Las prevalencias fueron estimadas aplicando un modelo logístico multinomial mixto con efectos aleatorios de área

| Comunidad autónoma     | Año 2017         |                  |                 |                 | Año 2020         |                  |                  |                |
|------------------------|------------------|------------------|-----------------|-----------------|------------------|------------------|------------------|----------------|
|                        | 35-54 años       | 55-64 años       | 65-74 años      | ≥ 75 años       | 35-54 años       | 55-64 años       | 65-74 años       | ≥ 75 años      |
| Andalucía              | 25,2 (19,6-30,8) | 26,0 (19,8-32,2) | 12,7 (8,6-16,8) | 9,7 (6,8-12,7)  | 26,0 (18,9-33,2) | 26,6 (18,3-34,9) | 14,8 (10,1-19,6) | 4,7 (2,7-6,7)  |
| Aragón                 | 19,7 (14,0-25,3) | 13,0 (7,8-18,3)  | 14,2 (7,6-20,8) | 12,5 (6,1-19,0) | 8,6 (5,2-12,1)   | 10,2 (5,3-15,1)  | 6,0 (2,1-9,9)    | 1,6 (0,5-2,8)  |
| Principado de Asturias | 7,7 (4,8-10,6)   | 7,9 (4,3-11,5)   | 4,2 (2,0-6,5)   | 2,3 (1,0-3,7)   | 4,5 (2,8-6,3)    | 3,9 (1,8-5,9)    | 3,4 (1,3-5,4)    | 1,5 (0,2-2,7)  |
| Islas Baleares         | 9,7 (6,2-13,2)   | 8,6 (4,7-12,4)   | 4,6 (1,9-7,3)   | 2,8 (1,1-4,4)   | 9,8 (5,7-13,8)   | 10,4 (4,5-16,3)  | 8,9 (3,6-14,1)   | 3,9 (0,8-6,9)  |
| Canarias               | 2,8 (1,6-4,0)    | 7,6 (4,1-11,0)   | 4,0 (1,5-6,4)   | 2,8 (1,0-4,6)   | 19,4 (12,6-26,1) | 19,6 (11,4-27,9) | 7,6 (3,7-11,5)   | 4,7 (1,9-7,4)  |
| Cantabria              | 11,0 (6,1-15,9)  | 12,5 (6,7-18,3)  | 4,7 (2,3-7,0)   | 2,0 (1,0-3,1)   | 16,4 (9,9-23,0)  | 21,3 (10,1-32,5) | 5,6 (2,3-8,9)    | 2,6 (0,7-4,6)  |
| Castilla y León        | 12,6 (9,1-16,0)  | 10,2 (6,6-13,8)  | 8,6 (5,1-12,2)  | 5,3 (3,3-7,3)   | 11,4 (6,7-16,0)  | 12,1 (6,2-18,1)  | 6,6 (2,9-10,3)   | 5,3 (2,3-8,4)  |
| Castilla-La Mancha     | 13,8 (9,5-18,1)  | 18,6 (11,3-26,0) | 5,1 (2,6-7,7)   | 5,1 (2,6-7,7)   | 22,8 (16,1-29,6) | 21,4 (13,1-29,7) | 8,1 (4,7-11,6)   | 3,1 (1,5-4,8)  |
| Cataluña               | 10,4 (7,6-13,2)  | 8,5 (5,3-11,8)   | 7,2 (3,7-10,8)  | 4,2 (2,0-6,3)   | 6,2 (4,3-8,0)    | 7,3 (4,1-10,4)   | 7,7 (4,0-11,4)   | 2,0 (0,9-3,2)  |
| Comunidad Valenciana   | 14,2 (10,1-18,2) | 10,1 (6,2-14,0)  | 5,2 (2,9-7,6)   | 5,6 (2,9-8,2)   | 19,4 (13,4-25,4) | 15,4 (9,2-21,6)  | 7,7 (4,0-11,3)   | 6,1 (2,7-9,5)  |
| Extremadura            | 12,6 (8,2-17,0)  | 10,6 (6,2-15,0)  | 5,7 (2,4-9,0)   | 3,7 (0,9-6,5)   | 8,0 (5,0-11,0)   | 8,6 (4,3-12,8)   | 4,0 (1,3-6,6)    | 2,7 (0,3-5,2)  |
| Galicia                | 12,4 (8,3-16,5)  | 18,2 (11,7-24,7) | 4,9 (2,9-6,9)   | 8,1 (4,4-11,8)  | 16,3 (10,5-22,0) | 8,7 (4,6-12,7)   | 6,3 (3,2-9,5)    | 2,6 (0,8-4,3)  |
| Comunidad de Madrid    | 11,2 (8,4-13,9)  | 8,3 (5,0-11,6)   | 7,3 (4,0-10,5)  | 4,5 (2,0-7,1)   | 6,5 (4,5-8,6)    | 7,5 (4,3-10,6)   | 3,4 (1,5-5,2)    | 7,2 (1,8-12,6) |
| Región de Murcia       | 11,6 (8,5-14,7)  | 17,1 (9,6-24,5)  | 8,7 (4,1-13,3)  | 5,0 (2,5-7,6)   | 8,0 (5,4-10,5)   | 5,3 (2,7-7,9)    | 9,0 (3,8-14,1)   | 4,3 (1,6-7,1)  |
| Comunidad Foral de     | 12,7 (9,4-15,9)  | 16,9 (11,2-22,6) | 10,9 (5,9-15,9) | 10,1 (4,8-15,5) | 12,5 (6,6-18,5)  | 7,2 (2,8-11,5)   | 5,6 (1,8-9,5)    | 3,5 (0,5-6,4)  |

|            |                 |                |               |               |                 |                |                |               |
|------------|-----------------|----------------|---------------|---------------|-----------------|----------------|----------------|---------------|
| Navarra    |                 |                |               |               |                 |                |                |               |
| País Vasco | 4,8 (3,2-6,4)   | 6,8 (3,5-10,1) | 3,9 (1,8-5,9) | 5,2 (2,0-8,4) | 12,1 (6,8-17,4) | 8,5 (3,4-13,6) | 6,8 (2,5-11,2) | 1,6 (0,5-2,7) |
| La Rioja   | 10,9 (6,9-15,0) | 7,3 (3,8-10,8) | 6,1 (2,6-9,6) | 3,8 (1,3-6,2) | 9,5 (4,5-14,4)  | 8,7 (3,3-14,1) | 2,5 (0,7-4,3)  | 3,3 (0,7-5,9) |

**Tabla 3 del material adicional**

RR de los expuestos al HAT con respecto a los no expuestos empleados para el cálculo de la MA al HAT y en los análisis de sensibilidad, por causa de muerte y sexo, junto con sus intervalos de confianza del 95%.

| Análisis                 | Causa                 | Sexo    | RR               | Fuente                                   |
|--------------------------|-----------------------|---------|------------------|------------------------------------------|
| MA al HAT                | Cáncer de pulmón      | Ambos   | 1,16 (1,03-1,30) | Surgeon General Report 2006 <sup>1</sup> |
|                          | Cardiopatía isquémica | Ambos   | 1,27 (1,19-1,36) |                                          |
| Análisis de sensibilidad | Cáncer de pulmón      | Varones | 1,34 (0,97-1,84) | Hackshaw <sup>2</sup>                    |
|                          |                       | Mujeres | 1,24 (1,13-1,36) |                                          |
|                          | Cardiopatía isquémica | Ambos   | 1,23 (1,14-1,33) | Law et al. <sup>3</sup>                  |
|                          | EPOC                  | Varones | 1,57 (1,30-1,80) | Fischer <sup>4</sup>                     |
|                          |                       | Mujeres | 1,56 (1,30-1,80) |                                          |
|                          | ECV                   | Ambos   | 1,25 (1,12-1,38) | Oono et al. <sup>5</sup>                 |

ECV: Enfermedad cerebrovascular; EPOC: enfermedad pulmonar obstructiva crónica; HAT: humo ambiental de tabaco; MA: mortalidad atribuida. RR: riesgo relativo.

**Tabla 4 del material adicional**

RR de fumadores y exfumadores con respecto a nunca fumadores empleados para la distribución de las muertes atribuidas al humo ambiental de tabaco en función del estatus de fumador por sexo, grupo de edad y causa de muerte.

| Causa                 | Sexo    | Grupo de edad | RR*       |             |
|-----------------------|---------|---------------|-----------|-------------|
|                       |         |               | Fumadores | Exfumadores |
| Cáncer de pulmón      | Varones | 35-54         | 14,33     | 4,40        |
|                       |         | 55-64         | 19,03     | 4,57        |
|                       |         | 65-74         | 28,29     | 7,79        |
|                       |         | ≥ 75 años     | 22,51     | 6,46        |
|                       | Mujeres | 35-54         | 13,30     | 2,64        |
|                       |         | 55-64         | 18,95     | 5,00        |
|                       |         | 65-74         | 23,65     | 6,80        |
|                       |         | ≥ 75 años     | 23,08     | 6,38        |
| Cardiopatía isquémica | Varones | 35-54         | 3,88      | 1,83        |
|                       |         | 55-64         | 2,99      | 1,52        |
|                       |         | 65-74         | 2,76      | 1,58        |
|                       |         | ≥ 75 años     | 1,98      | 1,32        |
|                       | Mujeres | 35-54         | 4,98      | 2,23        |
|                       |         | 55-64         | 3,25      | 1,21        |
|                       |         | 65-74         | 3,29      | 1,56        |
|                       |         | ≥ 75 años     | 2,25      | 1,42        |

RR: riesgo relativo.

\*Los riesgos relativos derivan del seguimiento de 5 cohortes estadounidenses<sup>6</sup>.

**Tabla 5 del material adicional**

Tasas de mortalidad atribuida al humo ambiental de tabaco brutas y estandarizadas por edad para los trienios 2016-2018 y 2019-2021 por cáncer de pulmón y cardiopatía isquémica. Los resultados se muestran por comunidad autónoma y sexo.

| Comunidad autónoma         | Sexo  | Trienio 2016-2018            |               | Trienio 2019-2021            |               |
|----------------------------|-------|------------------------------|---------------|------------------------------|---------------|
|                            |       | Tasas por 100.000 habitantes |               | Tasas por 100.000 habitantes |               |
|                            |       | Bruta                        | Estandarizada | Bruta                        | Estandarizada |
| Andalucía                  | Varón | 21,3                         | 24,5          | 25,4                         | 28,8          |
| Aragón                     | Varón | 18,3                         | 19,1          | 9,4                          | 9,8           |
| Principado de Asturias     | Varón | 9,3                          | 9,4           | 7,7                          | 7,6           |
| Islas Baleares             | Varón | 6,2                          | 7,4           | 11,9                         | 14,9          |
| Canarias                   | Varón | 6,7                          | 7,9           | 19,9                         | 22,5          |
| Cantabria                  | Varón | 8,5                          | 9,0           | 10,8                         | 11,2          |
| Castilla y León            | Varón | 13,3                         | 12,9          | 10,6                         | 10,2          |
| Castilla-La Mancha         | Varón | 10,4                         | 11,6          | 17,9                         | 19,4          |
| Cataluña                   | Varón | 6,8                          | 7,6           | 6,4                          | 7,1           |
| Comunidad Valenciana       | Varón | 10,2                         | 11,2          | 17,6                         | 19,2          |
| Extremadura                | Varón | 8,1                          | 8,3           | 11,3                         | 11,2          |
| Galicia                    | Varón | 10,0                         | 10,0          | 9,2                          | 9,1           |
| Comunidad de Madrid        | Varón | 6,2                          | 7,2           | 4,5                          | 5,2           |
| Región de Murcia           | Varón | 14,1                         | 17,2          | 6,5                          | 7,5           |
| Comunidad Foral de Navarra | Varón | 11,2                         | 12,3          | 8,4                          | 9,0           |
| País Vasco                 | Varón | 4,9                          | 5,1           | 10,8                         | 10,8          |
| La Rioja                   | Varón | 6,5                          | 6,9           | 7,0                          | 7,3           |
| Andalucía                  | Mujer | 10,4                         | 10,6          | 6,8                          | 6,9           |
| Aragón                     | Mujer | 12,1                         | 10,0          | 2,5                          | 2,3           |
| Principado de Asturias     | Mujer | 4,2                          | 3,6           | 2,3                          | 2,0           |
| Islas Baleares             | Mujer | 2,7                          | 3,0           | 3,4                          | 3,7           |
| Canarias                   | Mujer | 3,1                          | 3,6           | 6,4                          | 6,8           |
| Cantabria                  | Mujer | 3,1                          | 3,0           | 4,2                          | 4,0           |
| Castilla y León            | Mujer | 5,6                          | 4,4           | 5,1                          | 4,0           |
| Castilla-La Mancha         | Mujer | 4,8                          | 4,3           | 3,9                          | 3,8           |
| Cataluña                   | Mujer | 3,5                          | 3,3           | 2,1                          | 2,0           |
| Comunidad Valenciana       | Mujer | 5,3                          | 5,1           | 5,9                          | 5,6           |
| Extremadura                | Mujer | 4,2                          | 3,6           | 3,2                          | 2,7           |

|                            |       |     |     |     |     |
|----------------------------|-------|-----|-----|-----|-----|
| Galicia                    | Mujer | 7,8 | 6,2 | 3,2 | 2,9 |
| Comunidad de Madrid        | Mujer | 3,6 | 3,6 | 3,9 | 3,7 |
| Región de Murcia           | Mujer | 4,6 | 4,8 | 3,4 | 3,6 |
| Comunidad Foral de Navarra | Mujer | 7,9 | 7,1 | 2,8 | 2,6 |
| País Vasco                 | Mujer | 3,6 | 3,1 | 2,4 | 2,3 |
| La Rioja                   | Mujer | 4,0 | 3,6 | 2,8 | 2,5 |



## **BIBLIOGRAFÍA**

1. Office on Smoking and Health (US). The Health Consequences of Involuntary Exposure to Tobacco Smoke: A Report of the Surgeon General. Centers for Disease Control and Prevention - Atlanta (GA). 2006. Disponible en: <https://www.ncbi.nlm.nih.gov/books/NBK44324/>. Consultado 1 Jun 2023.
2. Hackshaw AK. Lung cancer and passive smoking. *Stat Methods Med Res.* 1998;7:119-136.
3. Law MR, Morris JK, Wald NJ. Environmental tobacco smoke exposure and ischaemic heart disease: an evaluation of the evidence. *BMJ.* 1997;315:973-980.
4. Fischer F, Kraemer A. Meta-analysis of the association between second-hand smoke exposure and ischaemic heart diseases, COPD and stroke. *BMC Public Health.* 2015;15:1202.
5. Oono IP, Mackay DF, Pell JP. Meta-analysis of the association between secondhand smoke exposure and stroke. *J Public Health (Oxf).* 2011;33:496-502.
6. Thun MJ, Carter BD, Feskanich D, et al. 50-year trends in smoking-related mortality in the United States. *N Engl J Med.* 2013;368:351-364.
